# Supplementary material
Source: PubMed Central journal article supplement (PMC2897333)
Supplement: supp_192_14_3735__1.pdf [file supp_192_14_3735__1.pdf]

**Table S1: Listing of *S. pyogenes* Strains Examined in this Study**

| Strain Name | Country of Origin | Year of Isolation | Disease <sup>a</sup> | <i>emm</i> -type <sup>b</sup> | <i>emm</i> pattern <sup>c</sup> | <i>spn</i> Bayesian Cluster <sup>d</sup> | IFS <sup>e</sup> | House-keeping ST <sup>f</sup> |
|-------------|-------------------|-------------------|----------------------|-------------------------------|---------------------------------|------------------------------------------|------------------|-------------------------------|
| MGAS2096    | Trinidad          | 1960              | AGN                  | 12                            | A-C                             | 1 (NADase active)                        | Full length      | 36                            |
| D306        | Trinidad          | 1968              | AGN                  | 57                            | A-C                             | 4 (NADase inactive)                      | Truncated 1      | 33                            |
| SS53        | USA               | 1942              | ARF                  | 37                            | A-C                             | 3 (NADase inactive)                      | Truncated 2      | 155                           |
| 22RS72      | USA               | 1941              | ARF                  | 24                            | A-C                             | 4 (NADase inactive)                      | Truncated 1      | 66                            |
| AA476       | Australia         | 1994              | carriage             | st3765                        | A-C                             | 3 (NADase inactive)                      | Truncated 1      | 108                           |
| 25RS84      | USA               | 1942              | carriage             | 14                            | A-C                             | 3 (NADase inactive)                      | Truncated 2      | 85                            |
| AA401       | Australia         | 1996              | carriage             | stCK401                       | A-C                             | 3 (NADase inactive)                      | Truncated 1      | 116                           |
| 11RS100     | USA               | 1942              | carriage             | 26                            | A-C                             | 4 (NADase inactive)                      | Truncated 1      | 67                            |
| MGAS2110    | Trinidad          | 1960              | eczema               | 1d4                           | A-C                             | 3 (NADase inactive)                      | Truncated 1      | 91                            |
| SS1676      | Australia         | 2000              | impetigo             | stNS90                        | A-C                             | 3 (NADase inactive)                      | Truncated 1      | 206                           |
| D488        | Trinidad          | 1971              | impetigo             | 55                            | A-C                             | 3 (NADase inactive)                      | Truncated 1      | 100                           |
| SS725       | unknown           | 1967              | impetigo             | 54                            | A-C                             | 3 (NADase inactive)                      | Truncated 1      | 159                           |
| MGAS5005    | Canada            | 1996              | invasive             | 1                             | A-C                             | 1 (NADase active)                        | Full length      | 28                            |
| 2RSC3       | USA               | 1942              | pharyngitis          | 38/40                         | A-C                             | 4 (NADase inactive)                      | Truncated 1      | 81                            |
| 1GL217      | USA               | 1946              | pharyngitis          | 17                            | A-C                             | 4 (NADase inactive)                      | Truncated 3      | 83                            |
| SS116       | unknown           | 1934              | scarlet              | 47                            | A-C                             | 4 (NADase inactive)                      | Truncated 3      | 83                            |
| MGAS2109    | New Zealand       | unknown           | tonsillitis          | 1d2                           | A-C                             | 3 (NADase inactive)                      | Truncated 1      | 93                            |
| SS1681      | China             | unknown           | unknown              | st980584                      | A-C                             | 3 (NADase inactive)                      | Truncated 1      | 300                           |
| 3RP70       | USA               | 1949              | unknown              | 29                            | A-C                             | 4 (NADase inactive)                      | Truncated 1      | 65                            |
| SS580       | unknown           | unknown           | unknown              | 23                            | A-C                             | 4 (NADase inactive)                      | Truncated 1      | 160                           |
| 2911-97     | Brazil            | 1997              | abscess              | st2911                        | D                               | 3 (NADase inactive)                      | Truncated 1      | 174                           |
| SS1447      | unknown           | unknown           | ARF                  | 85                            | D                               | 1 (NADase active)                        | Full length      | 109                           |
| C142        | USA               | 1942              | ARF                  | 34                            | D                               | 4 (NADase inactive)                      | Truncated 1      | 64                            |
| 1RS79       | USA               | 1941              | ARF                  | 42                            | D                               | 4 (NADase inactive)                      | Full length      | 80                            |
| SS1443      | Brazil            | 1997              | bacteremia           | st809                         | D                               | 3 (NADase inactive)                      | Truncated 2      | 143                           |
| 4756-01     | unknown           | 2001              | bacteremia           | 59                            | D                               | 1 (NADase active)                        | Full length      | 172                           |
| SS1373      | Papua New Guinea  | 1992              | bacteremia           | st2037                        | D                               | 3 (NADase inactive)                      | Truncated 2      | 301                           |
| 4770-01     | USA               | 2000              | bacteremia           | st369                         | D                               | 4 (NADase inactive)                      | Truncated 1      | 208                           |
| 5282-00     | USA               | 2000              | bacteremia           | st5282                        | D                               | 3 (NADase inactive)                      | Truncated 2      | 182                           |
| 3850-01     | USA               | 2001              | bacteremia           | st3850                        | D                               | 3 (NADase inactive)                      | Truncated 1      | 174                           |
| 10RS101     | USA               | 1942              | carriage             | 32                            | D                               | 4 (NADase inactive)                      | Truncated 2      | 1                             |
| Alab49      | USA               | 1986              | impetigo             | 53                            | D                               | 3 (NADase inactive)                      | Truncated 2      | 11                            |
| A946        | Trinidad          | 1971              | impetigo             | 52                            | D                               | 3 (NADase inactive)                      | Truncated 1      | 43                            |
| 29486       | Czech Republic    | 1987              | impetigo             | 116                           | D                               | 1 (NADase active)                        | Full length      | 6                             |
| 29655       | Czech Republic    | 1988              | impetigo             | 81                            | D                               | 2 (NADase active)                        | Full length      | 57                            |
| 29689       | Czech Republic    | 1988              | impetigo             | 83                            | D                               | 1 (NADase active)                        | Full length      | 5                             |
| D821        | Trinidad          | 1975              | impetigo             | 91                            | D                               | 3 (NADase inactive)                      | Truncated 2      | 13                            |
| 1165-99     | Egypt             | 1997-1998         | impetigo             | st854                         | D                               | 3 (NADase inactive)                      | Truncated 1      | 292                           |
| SS1098      | Egypt             | 1971              | impetigo             | 71                            | D                               | 4 (NADase inactive)                      | Truncated 1      | 130                           |
| SS1096      | Egypt             | 1971              | impetigo             | 65/69                         | D                               | 4 (NADase inactive)                      | Full length      | 129                           |

|          |                  |           |             |         |   |                     |             |     |
|----------|------------------|-----------|-------------|---------|---|---------------------|-------------|-----|
| D502     | Trinidad         | 1971      | impetigo    | 93      | D | 3 (NADase inactive) | Truncated 2 | 17  |
| SS1497   | Brazil           | 1998      | impetigo    | st3757  | D | 3 (NADase inactive) | Truncated 1 | 153 |
| AA249    | Australia        | 1995      | impetigo    | stCK249 | D | 3 (NADase inactive) | Truncated 2 | 113 |
| SS1434   | Australia        | unknown   | impetigo    | 98      | D | 3 (NADase inactive) | Truncated 2 | 10  |
| D633     | Trinidad         | 1972      | impetigo    | stD633  | D | 1 (NADase active)   | Full length | 48  |
| AA472    | Australia        | 1994      | impetigo    | 56      | D | 3 (NADase inactive) | Truncated 1 | 115 |
| AA216    | Australia        | 1995      | impetigo    | 74      | D | 4 (NADase inactive) | Truncated 1 | 120 |
| AA416    | Australia        | 1996      | impetigo    | 101     | D | 3 (NADase inactive) | Truncated 2 | 182 |
| SS1433   | Australia        | unknown   | impetigo    | 99      | D | 3 (NADase inactive) | Truncated 1 | 141 |
| MGAS308  | USA              | 1986-1990 | Invasive    | 105     | D | 3 (NADase inactive) | Truncated 1 | 72  |
| MGAS341  | USA              | 1986-1990 | invasive    | 119     | D | 3 (NADase inactive) | Truncated 1 | 97  |
| SS1369   | Ethiopia         | 1992      | invasive    | st1967  | D | 3 (NADase inactive) | Truncated 1 | 136 |
| SS1378   | Brazil           | 1996      | invasive    | st204   | D | 4 (NADase inactive) | Full length | 139 |
| 6949-99  | Argentina        | 1999      | invasive    | 123     | D | 3 (NADase inactive) | Truncated 2 | 123 |
| SS1469   | Chile            | 1997      | tonsillitis | st2940  | D | 3 (NADase inactive) | Truncated 1 | 147 |
| MGAS2111 | USA              | unknown   | unknown     | 95      | D | 3 (NADase inactive) | Truncated 2 | 14  |
| D997     | Japan            | 1976      | unknown     | 111     | D | 3 (NADase inactive) | Truncated 1 | 98  |
| A457     | Yugoslavia       | 1961      | unknown     | 36      | D | 4 (NADase inactive) | Truncated 1 | 47  |
| D432     | Egypt            | 1971      | unknown     | stD432  | D | 3 (NADase inactive) | Truncated 1 | 71  |
| SS795    | unknown          | 1968      | unknown     | 41      | D | 3 (NADase inactive) | Truncated 2 | 162 |
| SS1472   | Brazil           | 1997      | unknown     | st2917  | D | 3 (NADase inactive) | Truncated 1 | 149 |
| 2907-97  | Brazil           | 1997      | unknown     | 115     | D | 3 (NADase inactive) | Truncated 1 | 123 |
| D795     | USA              | 1975      | unknown     | 67      | D | 4 (NADase inactive) | Truncated 1 | 61  |
| 1RP278   | USA              | 1964      | ARF         | 9       | E | 1 (NADase active)   | Full length | 74  |
| 86-809   | USA              | 1986      | ARF         | 75      | E | 2 (NADase active)   | Full length | 49  |
| 3360-01  | USA              | 2001      | bacteremia  | 118     | E | 1 (NADase active)   | Full length | 167 |
| SS1416   | Malaysia         | 1996      | bacteremia  | 106     | E | 2 (NADase active)   | Full length | 140 |
| SS1371   | Papua New Guinea | 1992      | bacteremia  | 104     | E | 1 (NADase active)   | Full length | 137 |
| 1269-98  | USA              | 1998      | bacteremia  | 15      | E | 3 (NADase inactive) | Truncated 1 | 121 |
| SS1376   | The Gambia       | 1993      | bacteremia  | st2460  | E | 2 (NADase active)   | Full length | 138 |
| 3018-01  | USA              | 1995      | bacteremia  | 114     | E | 1 (NADase active)   | Full length | 188 |
| AA348    | Australia        | 1996      | carriage    | 25      | E | 1 (NADase active)   | Full length | 192 |
| ACTH81   | Australia        | 1997-1999 | carriage    | st11014 | E | 1 (NADase active)   | Full length | 112 |
| D691     | Trinidad         | 1972      | carriage    | 11      | E | 2 (NADase active)   | Full length | 23  |
| 1RP18RN  | USA              | 1946      | carriage    | 44/61   | E | 2 (NADase active)   | Full length | 31  |
| 29454    | Czech Republic   | 1987      | impetigo    | 58      | E | 1 (NADase active)   | Full length | 19  |
| SS1468   | Malaysia         | 1997      | impetigo    | 109     | E | 1 (NADase active)   | Full length | 198 |
| 4426-S   | USA              | 1970      | impetigo    | 92      | E | 1 (NADase active)   | Full length | 82  |
| 29740    | Czech Republic   | 1988      | impetigo    | 8       | E | 2 (NADase active)   | Full length | 59  |
| SS1541   | Egypt            | 1999      | impetigo    | st2147  | E | 1 (NADase active)   | Full length | 169 |
| AA188    | Australia        | 1995      | impetigo    | stNS554 | E | 1 (NADase active)   | Full length | 110 |
| SS1536   | Egypt            | 1999      | impetigo    | 124     | E | 2 (NADase active)   | Full length | 199 |
| 4500-S   | USA              | 1960      | impetigo    | 60      | E | 2 (NADase active)   | Full length | 53  |
| Alab53   | USA              | 1986      | impetigo    | 66      | E | 2 (NADase active)   | Full length | 44  |

|          |                |           |             |         |   |                     |             |     |
|----------|----------------|-----------|-------------|---------|---|---------------------|-------------|-----|
| NS292    | Australia      | 1990-1999 | impetigo    | stNS292 | E | 1 (NADase active)   | Full length | 114 |
| 5552-S   | USA            | 1971      | impetigo    | 68      | E | 1 (NADase active)   | Full length | 86  |
| 6250-S   | USA            | 1972      | impetigo    | 110     | E | 2 (NADase active)   | Full length | 27  |
| D316     | USA            | 1969      | invasive    | 25      | E | 1 (NADase active)   | Full length | 54  |
| MGAS261  | USA            | 1986-1990 | Invasive    | 77      | E | 2 (NADase active)   | Full length | 35  |
| SS1485   | USA            | 1998      | invasive    | st1389  | E | 2 (NADase active)   | Full length | 152 |
| SS1551   | Malaysia       | 1999      | invasive    | 107     | E | 1 (NADase active)   | Full length | 173 |
| SS1363   | USA            | unknown   | invasive    | 117     | E | 2 (NADase active)   | Full length | 134 |
| CT95-169 | USA            | 1995      | invasive    | 102     | E | 1 (NADase active)   | Full length | 60  |
| CT95-122 | USA            | 1995      | invasive    | 94      | E | 3 (NADase inactive) | Truncated 2 | 89  |
| CT95-121 | USA            | 1995      | invasive    | 73      | E | 3 (NADase inactive) | Truncated 2 | 7   |
| MGAS6180 | USA            | 1998      | invasive    | 28      | E | 1 (NADase active)   | Full length | 52  |
| CT95-189 | USA            | 1995      | invasive    | 28      | E | 1 (NADase active)   | Full length | 52  |
| TW128    | Taiwan         | 1992      | invasive    | 103     | E | 2 (NADase active)   | Full length | 392 |
| SS1377   | The Gambia     | 1993      | invasive    | st2463  | E | 1 (NADase active)   | Full length | 166 |
| MGAS2017 | USA            | 1991      | pharyngitis | 89      | E | 2 (NADase active)   | Full length | 77  |
| SS951    | USA            | 1970      | pharyngitis | 50/62   | E | 2 (NADase active)   | Full length | 2   |
| SS1402   | United Kingdom | 1972      | skin sepsis | 82      | E | 1 (NADase active)   | Full length | 26  |
| 6735-99  | Brazil         | 1999      | unknown     | st6735  | E | 2 (NADase active)   | Full length | 165 |
| SS1470   | New Zealand    | 1997      | unknown     | 113     | E | 2 (NADase active)   | Full length | 148 |
| SS1550   | Thailand       | unknown   | unknown     | 112     | E | 1 (NADase active)   | Full length | 194 |
| SS636    | United Kingdom | 1935      | unknown     | 13L     | E | 1 (NADase active)   | Full length | 157 |
| SS582    | United Kingdom | unknown   | unknown     | 27G     | E | 1 (NADase active)   | Full length | 156 |
| CS110    | USA            | Pre-1990  | unknown     | 76      | E | 1 (NADase active)   | Full length | 51  |
| SS737    | unknown        | 1967      | unknown     | 48      | E | 2 (NADase active)   | Full length | 161 |
| A956     | unknown        | 1967      | unknown     | 63      | E | 2 (NADase active)   | Full length | 88  |
| MGAS2140 | Ethiopia       | unknown   | unknown     | 66      | E | 1 (NADase active)   | Full length | 95  |
| 10RS57   | USA            | 1941      | wound       | 87      | E | 1 (NADase active)   | Full length | 62  |
| SS1151   | unknown        | unknown   | wound       | 79      | E | 1 (NADase active)   | Full length | 132 |

<sup>a</sup> Disease caused by the bacterial isolate. ARF is acute rheumatic fever and AGN is acute glomerulonephritis.

<sup>b</sup> *emm*-type based on sequence analysis of the *emm* gene using primers 1 and 2 according to the standard CDC protocol ([http://www.cdc.gov/ncidod/biotech/strep/protocol\\_emm-type.htm](http://www.cdc.gov/ncidod/biotech/strep/protocol_emm-type.htm))

<sup>c</sup> *emm* pattern is defined by the # of *emm* genes, the *emm* gene subfamily content, and the relative arrangement of these genes on the chromosome (6).

<sup>d</sup> Bayesian clusters were identified through the frequencies of single nucleotide polymorphisms using Bayesian Analysis of Population Structure (BAPS). Clusters are described in the text. NADase active *spn* encodes for a glycine at amino acid position 330, while NADase inactive *spn* encodes for a aspartic acid at amino acid position 330.

<sup>e</sup> Full length IFS is 161 amino acids in length (See Fig. 3, strain JRS4). Truncated 1 contains a substitution of an adenine for a thymine at bp 71 that causes a nonsense mutation at codon 24 (See Fig. 3, strains MGAS2109 and 22RS72). Truncated 2 contains a deletion of a thymine at bp 71 and results in a nonsense mutation at codon 24 (See Fig. 3, strain MGAS2111). Truncated 3 contains a deletion of an adenine at bp 40 that triggers a frame shift resulting in a stop codon at amino acid position 19 (See Fig. 3, strain SS116).

<sup>f</sup> Housekeeping Sequence Type (ST) is based on the internal fragments of 7 housekeeping genes used for multilocus sequence typing of *S. pyogenes* (see methods).
