# Supplementary material
Source: PubMed Central journal article supplement (PMC2897333)
Supplement: supp_192_14_3735__2.pdf [file supp_192_14_3735__2.pdf]

**Table S2: GenBank Accession Numbers for the *spn* and *ifs* Gene Sequences Examined in this Study**

| <i>Streptococcus pyogenes</i><br>Strain Name | <i>S. pyogenes</i> NAD <sup>+</sup> -<br>glycohydrolase ( <i>spn</i> ) | Immunity Factor for SPN ( <i>ifs</i> ) |
|----------------------------------------------|------------------------------------------------------------------------|----------------------------------------|
| MGAS2140                                     | HM214223                                                               | HM214388                               |
| SS1433                                       | HM214224                                                               | HM214333                               |
| 5282-00                                      | HM214225                                                               | HM214334                               |
| SS1378                                       | HM214226                                                               | HM214389                               |
| 3850-01                                      | HM214227                                                               | HM214335                               |
| 6949-99                                      | HM214228                                                               | HM214336                               |
| 2911-97                                      | HM214229                                                               | HM214337                               |
| SS725                                        | HM214230                                                               | HM214338                               |
| Alab49                                       | HM214231                                                               | HM214339                               |
| 29454                                        | HM214232                                                               | HM214390                               |
| A946                                         | HM214233                                                               | HM214340                               |
| AA476                                        | HM214234                                                               | HM214387                               |
| SS1468                                       | HM214235                                                               | HM214392                               |
| MGAS2017                                     | HM214236                                                               | HM214393                               |
| SS1676                                       | HM214237                                                               | HM214341                               |
| 2RSC3                                        | HM214238                                                               | HM214342                               |
| 4426-S                                       | HM214239                                                               | HM214394                               |
| 29740                                        | HM214240                                                               | HM214395                               |
| 1RP278                                       | HM214241                                                               | HM214396                               |
| 86-809                                       | HM214242                                                               | HM214397                               |
| AA348                                        | HM214243                                                               | HM214398                               |
| 10RS101                                      | HM214244                                                               | HM214343                               |
| 3360-01                                      | HM214245                                                               | HM214399                               |
| SS1402                                       | HM214246                                                               | HM214400                               |
| 29486                                        | HM214247                                                               | HM214401                               |
| D316                                         | HM214248                                                               | HM214402                               |
| 6735-99                                      | HM214249                                                               | HM214403                               |
| SS1541                                       | HM214250                                                               | HM214404                               |
| 29655                                        | HM214251                                                               | HM214405                               |
| SS1447                                       | HM214252                                                               | HM214406                               |
| AA188                                        | HM214253                                                               | HM214407                               |
| SS1443                                       | HM214254                                                               | HM214344                               |
| 25RS84                                       | HM214255                                                               | HM214345                               |
| 4756-01                                      | HM214256                                                               | HM214408                               |
| 1GL217                                       | HM214257                                                               | HM214346                               |
| AA401                                        | HM214258                                                               | HM214347                               |
| SS1373                                       | HM214259                                                               | HM214348                               |
| SS1536                                       | HM214260                                                               | HM214409                               |
| 29689                                        | HM214261                                                               | HM214410                               |
| MGAS261                                      | HM214262                                                               | HM214411                               |

|          |          |          |
|----------|----------|----------|
| SS1681   | HM214263 | HM214349 |
| 10RS57   | HM214264 | HM214412 |
| D821     | HM214265 | HM214350 |
| SS1485   | HM214266 | HM214413 |
| MGAS2111 | HM214267 | HM214351 |
| SS1469   | HM214268 | HM214352 |
| SS1551   | HM214269 | HM214414 |
| C142     | HM214270 | HM214353 |
| SS1470   | HM214271 | HM214415 |
| D997     | HM214272 | HM214354 |
| SS1363   | HM214273 | HM214416 |
| 1165-99  | HM214274 | HM214355 |
| A457     | HM214275 | HM214356 |
| SS1098   | HM214276 | HM214357 |
| ACTH81   | HM214277 | HM214417 |
| 4500-S   | HM214278 | HM214418 |
| D432     | HM214279 | HM214358 |
| CT95-169 | HM214280 | HM214419 |
| SS1096   | HM214281 | HM214420 |
| 1RS79    | HM214282 | HM214421 |
| D502     | HM214283 | HM214359 |
| SS1497   | HM214284 | HM214360 |
| Alab53   | HM214285 | HM214422 |
| CT95-122 | HM214286 | HM214361 |
| SS1416   | HM214287 | HM214423 |
| D691     | HM214288 | HM214424 |
| AA249    | HM214289 | HM214362 |
| SS1371   | HM214290 | HM214425 |
| 3RP70    | HM214291 | HM214363 |
| SS1434   | HM214292 | HM214364 |
| SS795    | HM214293 | HM214365 |
| SS53     | HM214294 | HM214366 |
| CT95-121 | HM214295 | HM214367 |
| SS951    | HM214296 | HM214426 |
| 1RP18RN  | HM214297 | HM214427 |
| SS1472   | HM214298 | HM214368 |
| 4770-01  | HM214299 | HM214369 |
| D633     | HM214300 | HM214428 |
| SS1550   | HM214301 | HM214429 |
| AA472    | HM214302 | HM214370 |
| SS636    | HM214303 | HM214430 |
| AA216    | HM214304 | HM214371 |
| SS582    | HM214305 | HM214431 |
| D306     | HM214306 | HM214372 |
| 1269-98  | HM214307 | HM214373 |

|                       |                                     |                                     |
|-----------------------|-------------------------------------|-------------------------------------|
| SS1376                | HM214308                            | HM214432                            |
| NS292                 | HM214309                            | HM214433                            |
| 11RS100               | HM214310                            | HM214374                            |
| CT95-189              | HM214311                            | HM214434                            |
| 5552-S                | HM214312                            | HM214435                            |
| MGAS308               | HM214313                            | HM214375                            |
| TW128                 | HM214314                            | HM214436                            |
| SS1151                | HM214315                            | HM214437                            |
| AA416                 | HM214316                            | HM214376                            |
| 2907-97               | HM214317                            | HM214377                            |
| MGAS2109              | HM214318                            | HM214378                            |
| SS1377                | HM214319                            | HM214438                            |
| CS110                 | HM214320                            | HM214439                            |
| 3018-01               | HM214321                            | HM214440                            |
| SS737                 | HM214322                            | HM214441                            |
| D488                  | HM214323                            | HM214379                            |
| MGAS341               | HM214324                            | HM214380                            |
| D795                  | HM214325                            | HM214381                            |
| 6250-S                | HM214326                            | HM214442                            |
| A956                  | HM214327                            | HM214391                            |
| SS1369                | HM214328                            | HM214382                            |
| MGAS2110              | HM214329                            | HM214383                            |
| SS116                 | HM214330                            | HM214384                            |
| 22RS72                | HM214331                            | HM214385                            |
| SS580                 | HM214332                            | HM214386                            |
| MGAS5005 <sup>a</sup> | NC_007297 REGION:<br>150154..151518 | NC_007297 REGION:<br>151523..152008 |
| MGAS2096 <sup>b</sup> | NC_008023 REGION:<br>155389..156753 | NC_008023 REGION:<br>156758..157243 |
| MGAS6180 <sup>c</sup> | NC_007296 REGION:<br>154914..156278 | NC_007296 REGION:<br>156283..156768 |

<sup>a</sup> The *spn* and *ifs* sequences from MGAS5005 were identical to those found in the previously published whole *S. pyogenes* genome sequence (53). The accession numbers for appropriate regions within the previously available genome sequences are included.

<sup>b</sup> The *spn* and *ifs* sequences from MGAS2096 were identical to those found in the previously published whole *S. pyogenes* genome sequence (3). The accession numbers for appropriate regions within the previously available genome sequences are included.

<sup>c</sup> The *spn* and *ifs* sequences from MGAS6180 were identical to those found in the previously published whole *S. pyogenes* genome sequence (21). The accession numbers for appropriate regions within the previously available genome sequences are included.
